# Supplementary material
Source: PubMed Central journal article supplement (PMC4020986)
Supplement: NIHMS559297-supplement-01.pdf [file NIHMS559297-supplement-01.pdf]

Supplemental Figures

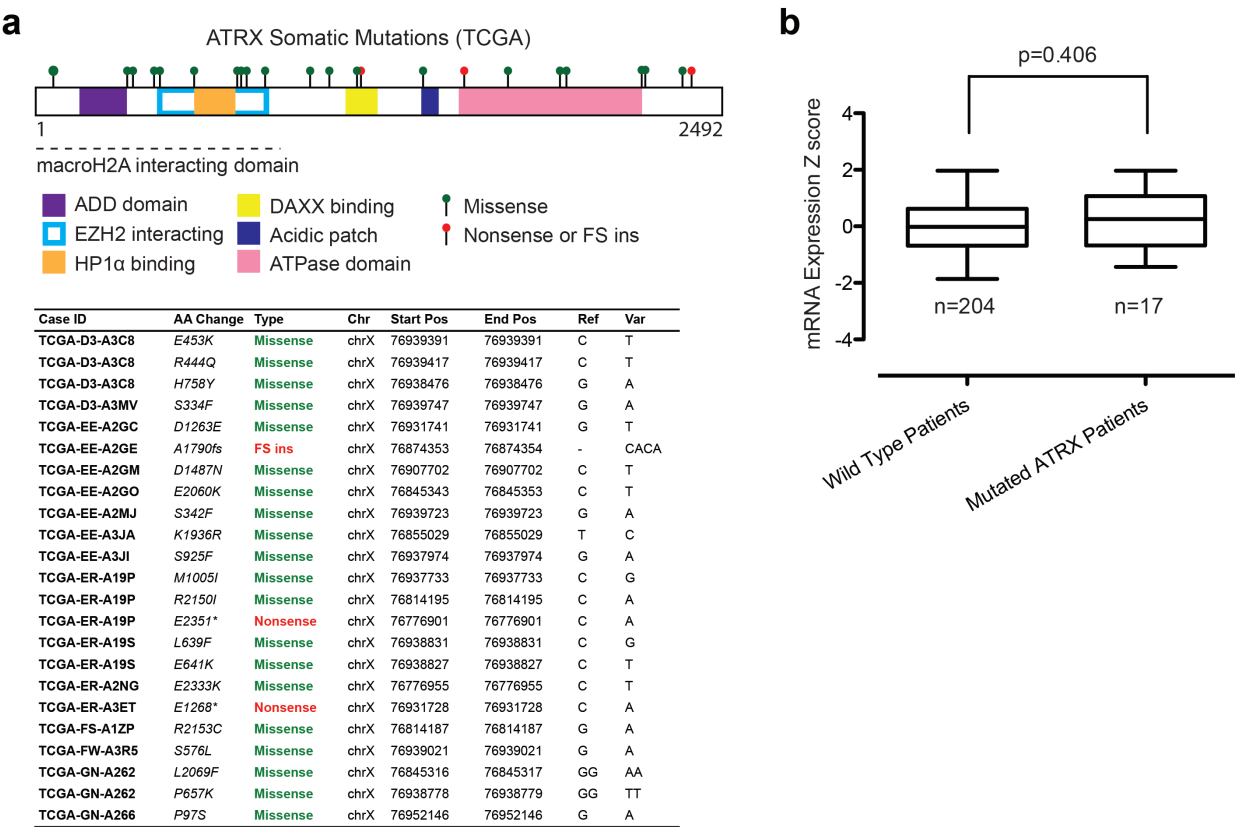

**Supplemental Figure S1. ATRX status in cutaneous melanoma as reported by TCGA.** (a) Table illustrating reported ATRX mutations (17/228 melanoma tumors; mutation rate = 7.5%). Four tumors displayed multiple ATRX mutations (23 mutations identified in 17 tumors). Schematic (top) depicts approximate location of mutations within the ATRX protein product. (b) Plot showing ATRX mRNA expression (from RNA-seq) of ATRX wild type vs. mutated patients. The Z score was calculated by cBioPortal by normalizing the mRNA expression values to the average of the reference samples. Statistical significance was derived using unpaired Student's t-test, p-value indicated. All patient samples utilized for this analysis have mRNA expression and sequencing data available at <http://www.cbioportal.org>.

## Supplemental Materials and Methods

### Immunohistochemistry and statistical analysis.

Immunohistochemistry was performed as previously described (Kapoor *et al.*, 2010). Briefly, Institutional Review Board (IRB) approved FFPE specimens were obtained from Icahn School of Medicine at Mount Sinai Division of Dermatopathology (project number HSD08-00565) and Mount Sinai Biorepository Cooperative. Tumor sections were incubated with anti-ATRX antibody (Sigma, St. Louis, MO, Cat # HPA001906, 1:650). Slides were scored by two independent dermatopathologists in a blinded fashion and quantified for number of positively stained cells as well as intensity of the stain. The number of cells with positive nuclear staining was scored using a 4-point scale (1=0-25% positive cells; 2=25-50% positive cells; 3=50-75% positive cells; 4=75-100% positive cells). Intensity was scored as absent, weak or strong (1-3, respectively). The two scores were multiplied to yield a final score per pathologist per slide. Inter-observer consistency between pathologists was assessed using Spearman's rank correlation. Statistical significance of ATRX in melanoma progression was assessed using the Kruskal-Wallis one-way analysis of variance test. Significance between any two tissue types was assessed using two-sided Mann-Whitney U tests. This study was conducted according to the Declaration of Helsinki Principles.

**cDNA isolation, RT-PCR analysis, and quantitative RT-PCR Analysis.** Total RNA from tissues was extracted using RNeasy Kit (Qiagen, Hilden, Germany). A total of 1 ug of RNA was used to synthesize cDNA using the First Strand cDNA synthesis kit (Origene, Rockville, MD). The synthesized cDNA was amplified with primers flanking the ATRX coding regions in five fragments (see Figure 2). PCR reactions were performed using High Fidelity Platinum Taq (Life Technologies, Grand Island, NY) and products were run on a 1% agarose gel and imaged. qPCR analysis for ATRX was conducted as previously described (Kapoor *et al.*, 2010) and

levels were normalized to GAPDH. Approval to collect melanoma specimens was granted by Mount Sinai Biorepository Cooperative and approval to collect benign nevi was granted by Mount Sinai School of Medicine’s Division of Dermatopathology (project number 08-0964). The quality of all tissues was assessed by a pathologist and tissues analyzed for PCR had purity of ~95% for benign nevi and ≥80% for metastatic melanoma specimens All primer sequences used for ATRX analysis in this study are listed below:

|             | Forward Primer (5'-3')     | Reverse Primer (5'-3')        |
|-------------|----------------------------|-------------------------------|
| Fragment 1  | ATGACCGCTGAGCCCAT          | GGAAGGAACAGACACAATATC         |
| Fragment 2  | GAGCACATGCATCAGAATGTTC     | GGAATATTTCTCAGTATCAGATGATGAAI |
| Fragment 3  | GCTGAGAAGTCAACAGGGAAAG     | GCAATCCACATAAACTGAACAC        |
| Fragment 4  | GCAAAGAAAGCAGAGTTGGAAG     | GAACCATCTAAACGGTAATAGTCAATG   |
| Fragment 5  | GGAAGTGGCAGTGACAATGAT      | CATTGATTTCCCTTGGAAGGT         |
|             |                            |                               |
| ATRX N-Term | GTGGTTCTGGAAGTAACTCTGATATG | CGTGACGATCCTGAAGACTTG         |
| ATRX C-Term | GGAGCCCTGTCAGCAATG         | GCTGTCACACTGTTTGTTC           |
| GAPDH       | TTTGTCAAGCTCATTTCTGG       | TGATGGTACATGACAAGGTGC         |
